# Supplementary material for: Computer simulations of entropic cohesion in reversibly crosslinked polymers
Source: Royal Society of Chemistry journal article supplement (doi:10.1039/d4sm01161a), 2024-12-18
Supplement: d4sm01161a1.pdf [file d4sm01161a1.pdf]

## Supplementary Information (SI)

### Computer Simulations of Entropic Cohesion in Reversibly Crosslinked Polymers

Rahul Karmakar,<sup>1</sup> Nayana Venkatareddy,<sup>2</sup> Himanshu,<sup>1</sup> Michele Valsecchi,<sup>3</sup> Prabal K. Maiti,<sup>2</sup> Srikanth Sastry,<sup>4\*</sup> Sanat K. Kumar,<sup>3\*</sup> and Tarak K. Patra<sup>1\*</sup>

<sup>1</sup>Department of Chemical Engineering, Indian Institute of Technology, Madras, Chennai 600036, India

<sup>2</sup>Center for Condensed Matter Theory, Department of Physics, Indian Institute of Science, Bengaluru, KA - 560012, India

<sup>3</sup>Department of Chemical Engineering, Columbia University, New York, USA

<sup>4</sup>Theoretical Sciences Unit and School of Advanced Materials, Jawaharlal Nehru Centre for Advanced Scientific Research, Bengaluru, KA-560064, India

#### I. Reversible Bond Exchange Mechanism in a Polymer Matrix:

The number of crosslink bonds in an associative polymer network is constant. They are exchanged between different pairs of monomers during the dynamics. In a dissociative polymer network, a monomer dissociates from its crosslinked partner before finding a new one. Therefore, the total number of crosslinks in a dissociative network fluctuates around a mean value. These two bond exchange mechanisms are schematically shown in Figure S1.

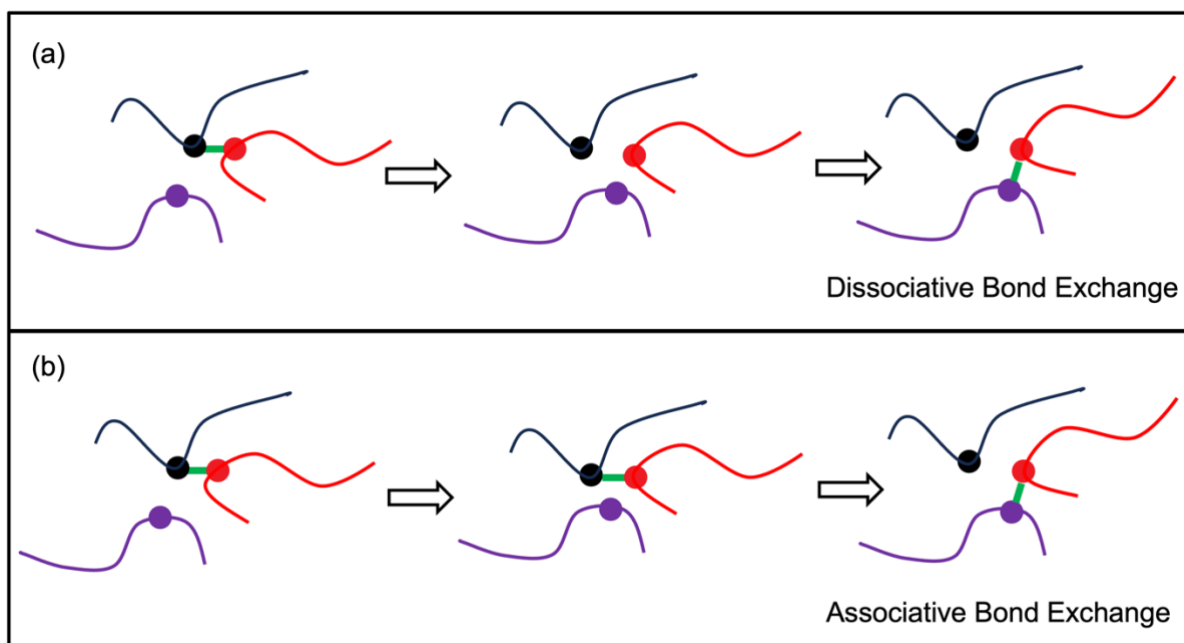

Figure S1: Schematic representations of a dissociative and an associative bond exchange are shown in (a), and (b), respectively. The green bond is exchanged between a pair of polymer chains using the MC simulation.

## II. Free Standing Polymer Film Simulations:

Free standing film simulations are done in an orthogonal simulation box with dimensions  $25\sigma \times 25\sigma \times 225\sigma$ . We have performed the simulations for five different bond lifetimes. The equilibrium properties of all the cases for chain length  $N=20$  are reported in Table S1.

| Bond Lifetime ( $\tau$ ) | Bulk Density ( $\sigma^{-3}$ ) | Interfacial width ( $\sigma$ ) | Surface Tension ( $\epsilon/\sigma^2$ ) |
|--------------------------|--------------------------------|--------------------------------|-----------------------------------------|
| 1                        | 0.89                           | 1.62                           | 0.97                                    |
| 5                        | 0.90                           | 1.61                           | 0.98                                    |
| 25                       | 0.90                           | 1.62                           | 0.97                                    |
| 250                      | 0.90                           | 1.61                           | 0.97                                    |
| 500                      | 0.90                           | 1.61                           | 0.97                                    |

Table S1: Equilibrium properties of the system – bulk density, interfacial width and surface tension are tabulated for different crosslinkers lifetimes. All the properties are in reduced LJ units.

## III. Constant Density Bulk Simulations:

We consider 500 polymer chains each of a chain length 20 for the constant density simulations. The polymers are initially placed in a 3D-simulation box with a number density of 0.9. The simulations are conducted for a reduced temperature  $T^* = 1$ . We perform  $10^7$  steps of equilibrium followed by a production run of another  $10^7$  steps. The bond energy and LJ pair energy during the production run are shown in Figure S2, along with the system's entropy.

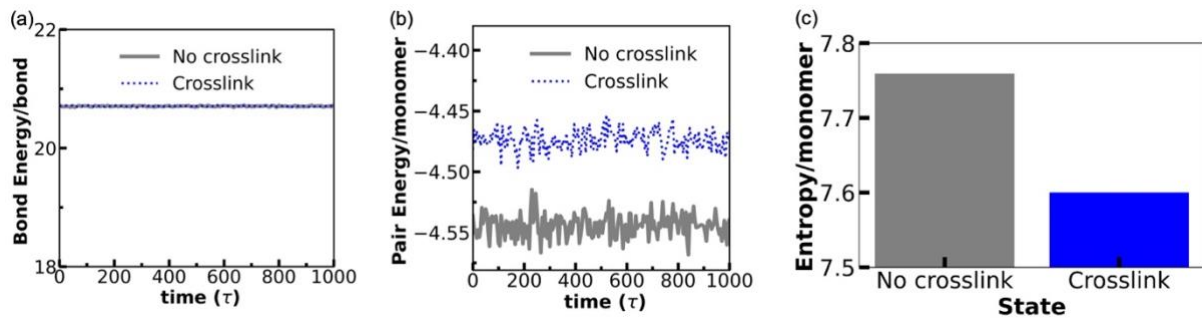

Figure S2: Bond energy and pair energy are shown as a function of time during the production run in (a) and (b), respectively. The entropy per monomer for the crosslinked and no-crosslinked cases are shown in (c).
